# Supplementary figures and images for: Self-assembly of a lacunary α-Keggin undecatungstophosphate into a three-dimensional network linked by s-block cations
Source: Royal Society of Chemistry journal article supplement (doi:10.1039/b209076g), 2002-01-01

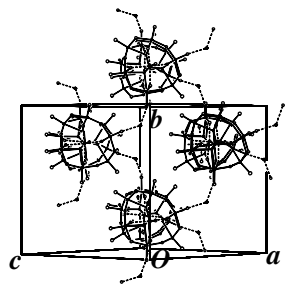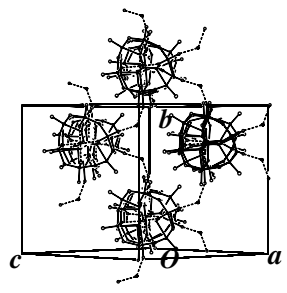

Supplement: b209076g1.pdf [file b209076g1.pdf]

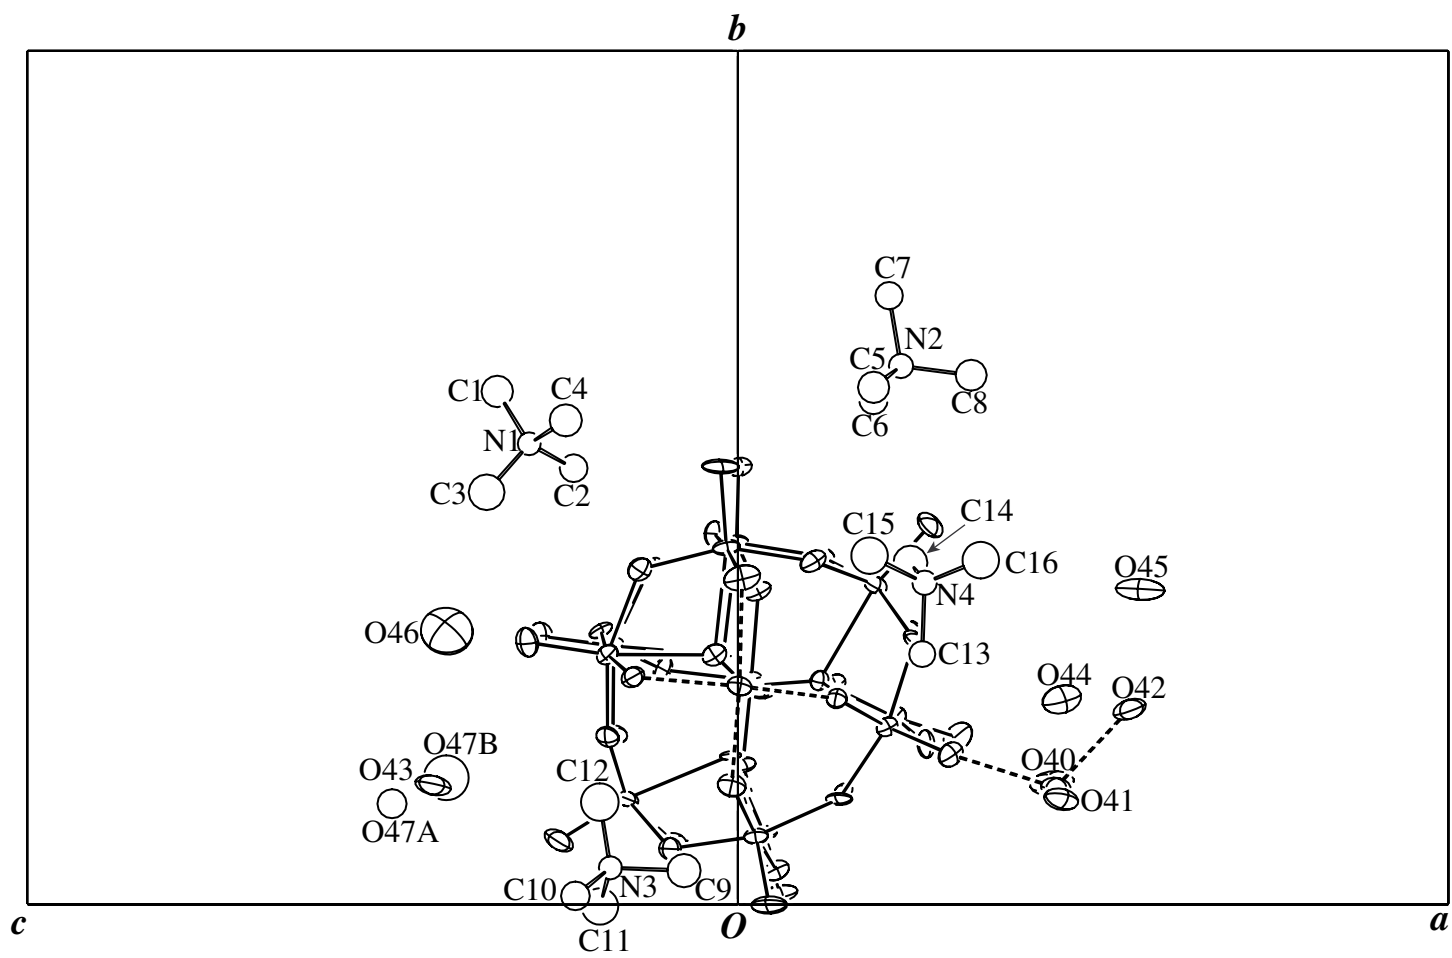

Supplement: b209076g2.pdf [file b209076g2.pdf]
